# Supplementary material for: Room-temperature synthesis of Ag- and Mn-doped Cs2NaBiCl6 octahedrons for dye photodegradation
Source: Royal Society of Chemistry journal article supplement (doi:10.1039/d3ce00372h), 2023-01-01
Supplement: d3ce00372h1.pdf [file d3ce00372h1.pdf]

## Supporting Information

### Room-temperature Synthesis of Ag- and Mn-Doped Cs<sub>2</sub>NaBiCl<sub>6</sub> Octahedrons for Dye Photodegradation

Ling Li <sup>a</sup>, Yuwei Zhong<sup>a</sup>, Yongfei Hu<sup>a</sup>, Jilin Bai<sup>a</sup>, Fen Qiao<sup>b</sup>, Abdelaal S. A. Ahmed<sup>c</sup>, Ghafar Ali<sup>d</sup>, Xiujian Zhao<sup>a</sup>, Yi Xie<sup>a,\*</sup>

<sup>a</sup> *State Key Laboratory of Silicate Materials for Architectures, Wuhan University of Technology, No. 122, Luoshi Road, Wuhan 430070, P. R. China.*

<sup>b</sup> *School of Energy and Power Engineering, Jiangsu University, No.301, Xuefu Road, Zhenjiang 212013, P. R. China.*

<sup>c</sup> *Chemistry Department, Faculty of Science, Al-Azhar University, Assiut 71524, Egypt.*

<sup>d</sup> *Nanomaterials Research Group (NRG), Physics Division, PINSTECH, Islamabad 44000, Pakistan.*

*Email: xiey@whut.edu.cn*

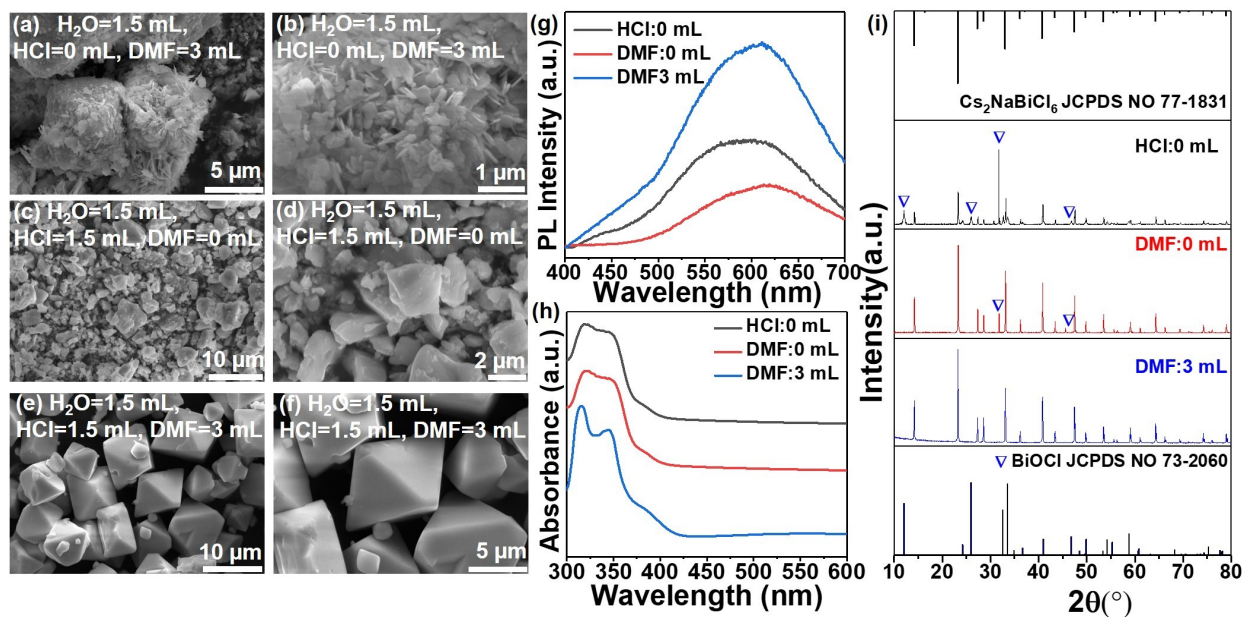

**Fig. S1** (a-f) SEM images of various samples synthesized in the presence of different solvent as dictated. (g-i) PL spectra (g), UV-visible diffuse reflectance spectra (h), and XRD patterns of the corresponding samples.

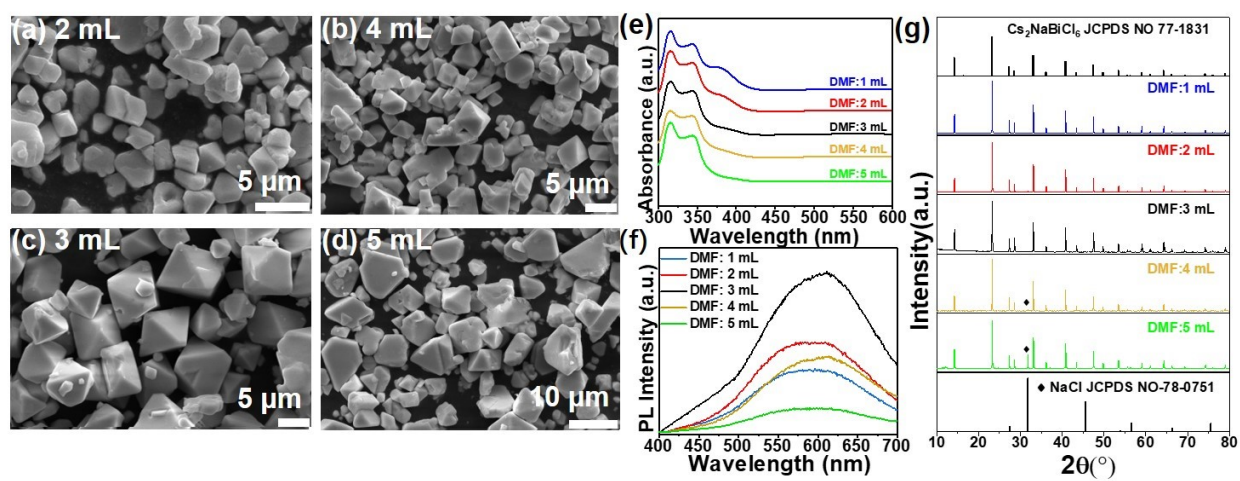

**Fig. S2** SEM images (a-d), PL spectra (e), UV-visible diffuse reflectance spectra (f), and XRD patterns (g) of the samples synthesized in the presence of different amounts of DMF as dictated in each panel.

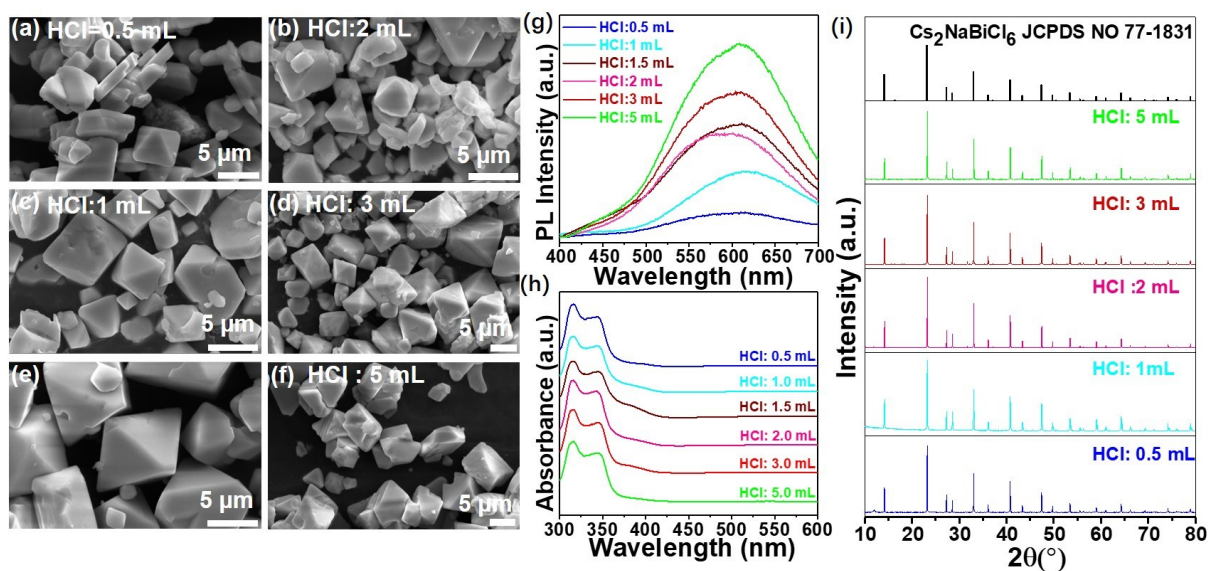

**Fig. S3** SEM images (a-f), PL spectra (g), UV-visible diffuse reflectance spectra (h), and XRD patterns (i) of the samples synthesized in the presence of different amounts of HCl as dictated in each panel.

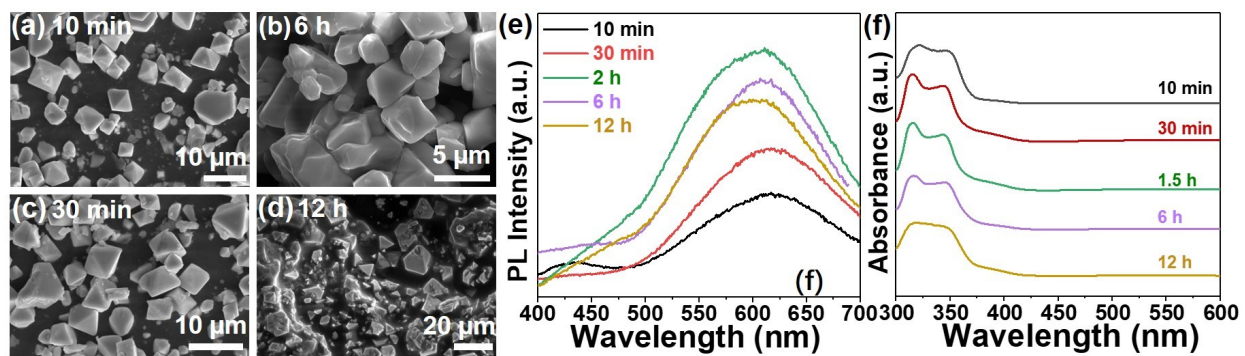

**Fig. S4** SEM images (a-d), PL spectra (e), UV-visible diffuse reflectance spectra (f) of the samples collected at different reaction time as dictated in each panel.

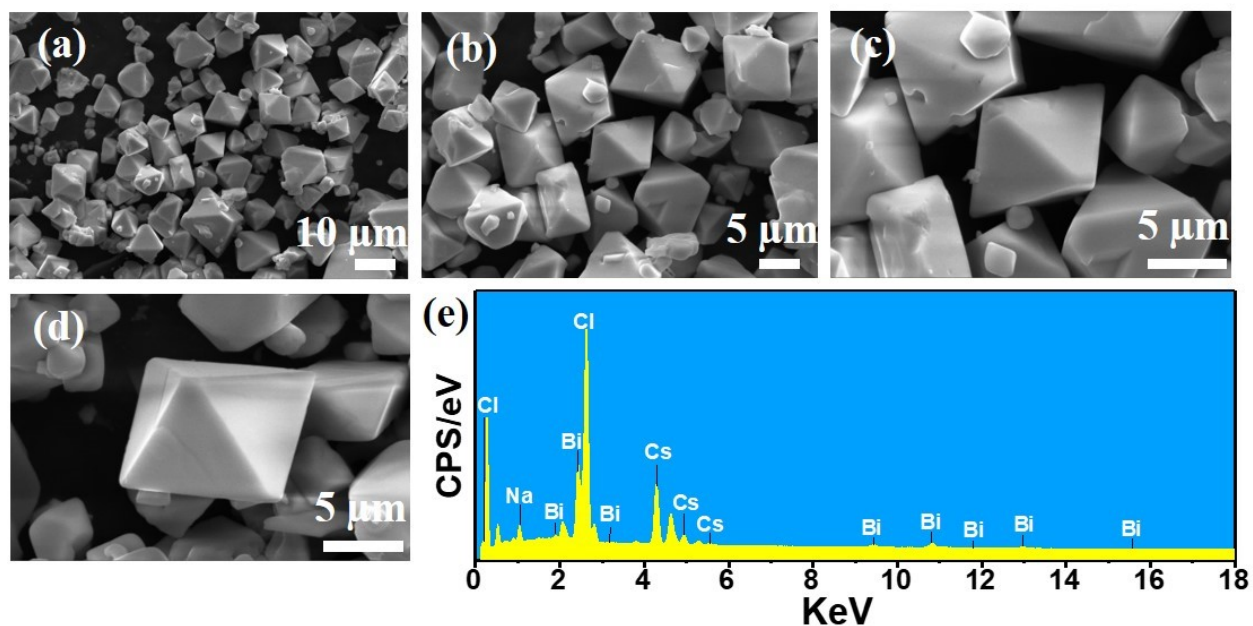

**Fig. S5** SEM images with different magnifications (a-d), and EDS spectrum (e) of the representative  $\text{Cs}_2\text{NaBiCl}_6$  sample as-synthesized in the presence of 1.5 mL HCl, 3 mL dimethylformamide, and 1.5 mL distilled water.

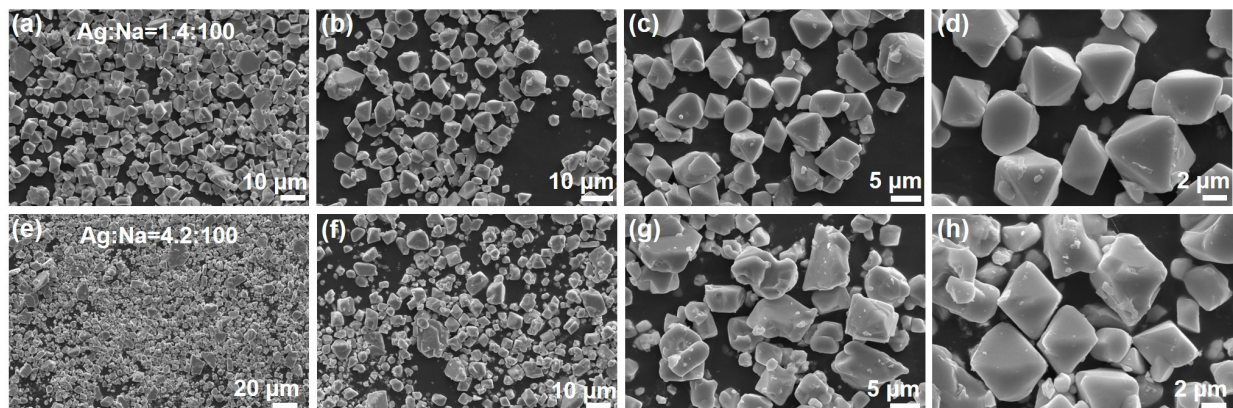

**Fig. S6** FESEM images of the various samples achieved with Ag:Na precursor molar ratios of 1.4:100 (a-d) and 4.2:100 (e-h), respectively.

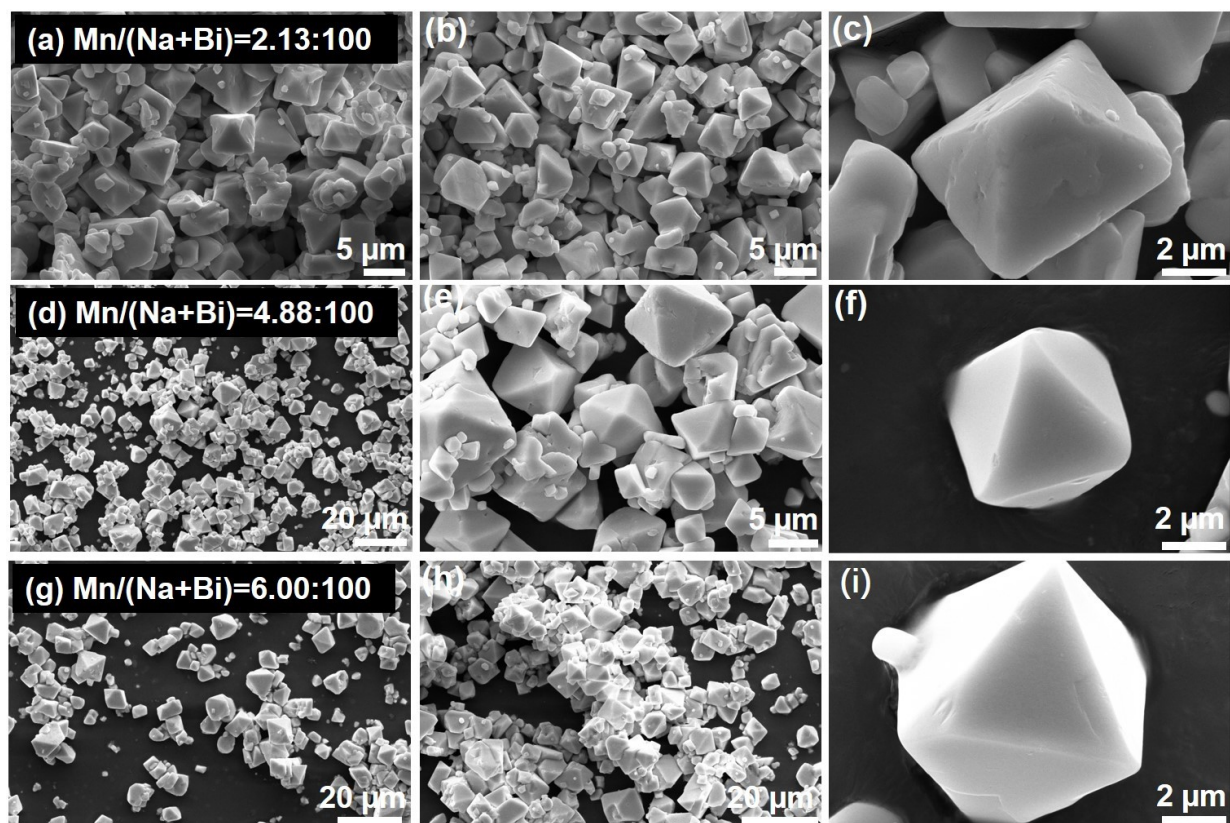

**Fig. S7** FESEM images of the Mn-doped CNBC samples achieved in the presence of Mn:(Na+Bi) precursor molar ratios of 2.13:100 (a-c), 4.88:100 (d-f) and 6.00:100 (g-i), respectively.



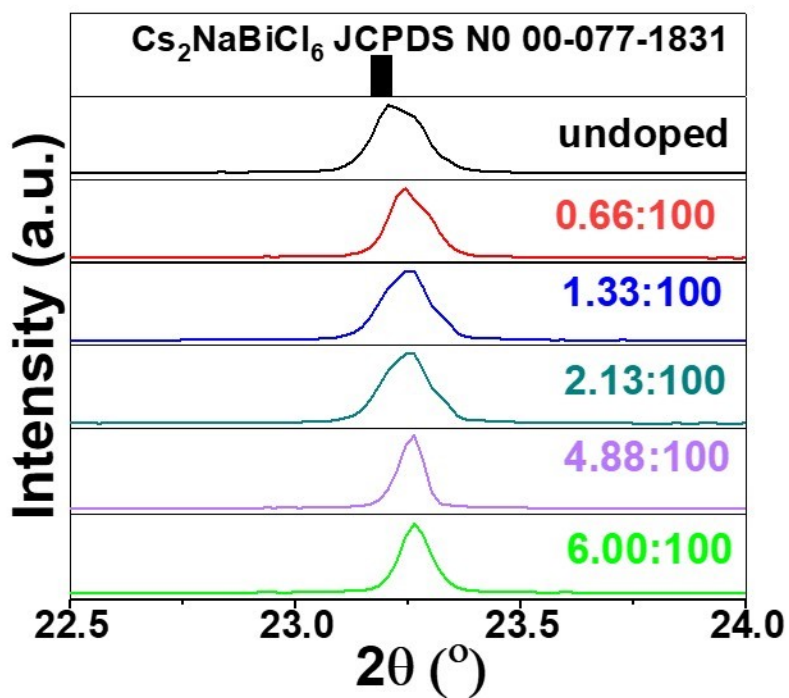

**Fig. S8** XRD patterns (d) of the Mn-doped CNBC samples achieved in the presence of different Mn:(Na+Bi) precursor molar ratios.

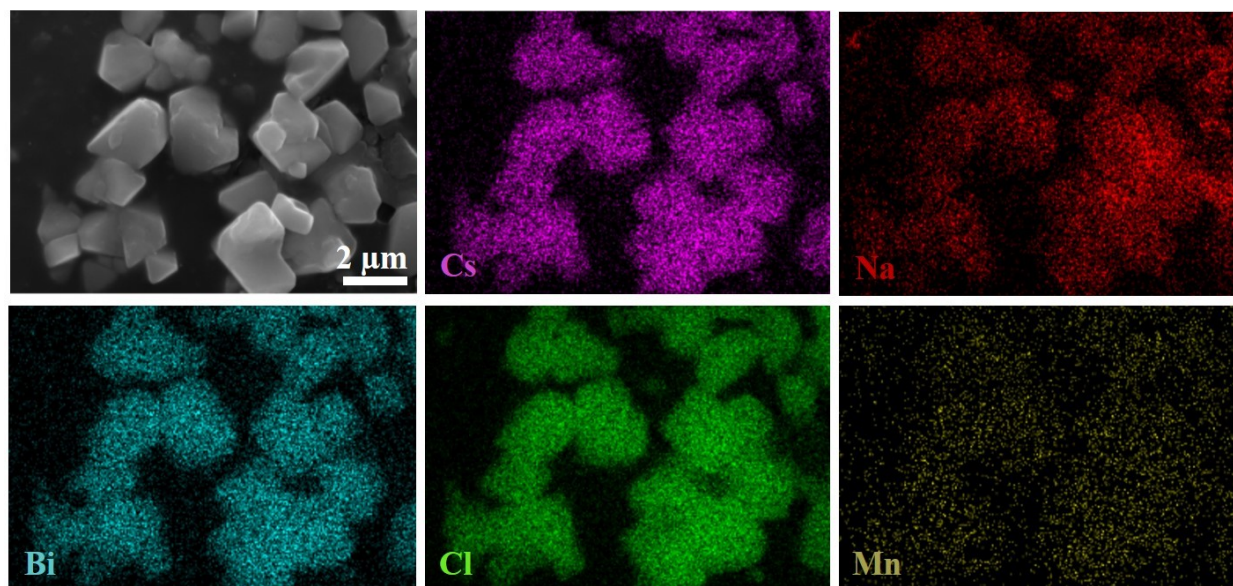

**Fig. S9** Elemental mapping of the representative Mn-doped CNBC sample.

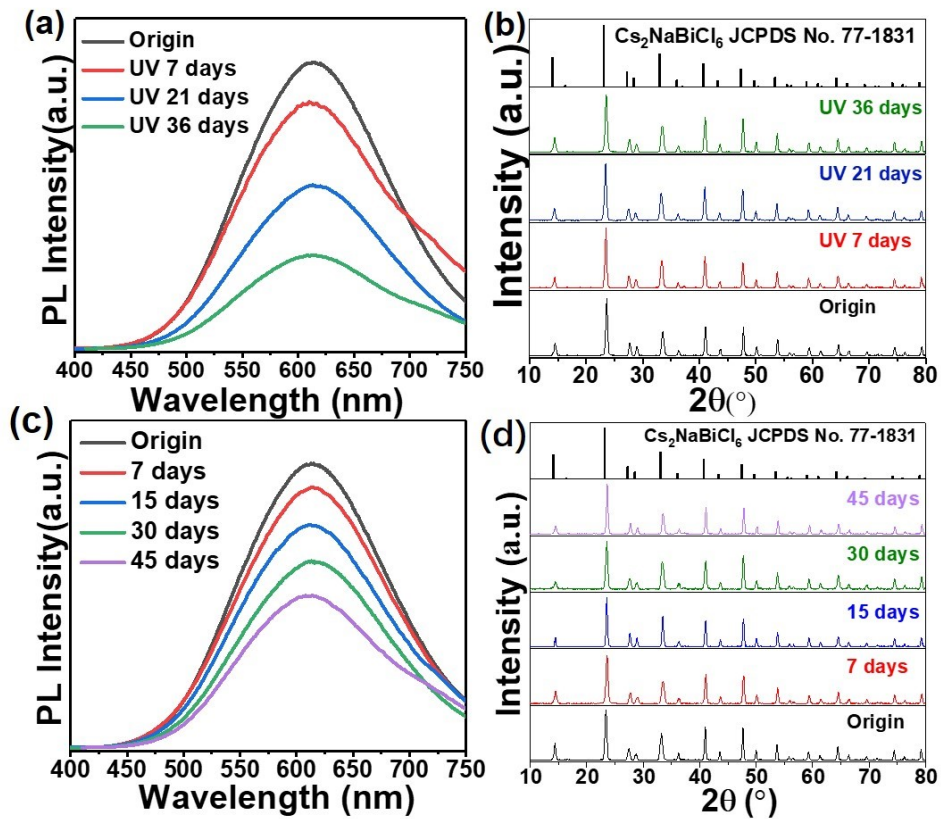

**Fig. S10** Stability analyses of the representative Ag-doped CNBC octahedrons. (a-b) Evolution of PL spectra (a) and XRD patterns (b) over time under UV irradiation. (c-d) Evolution of PL spectra (c) and XRD patterns (d) over time under ambient condition.

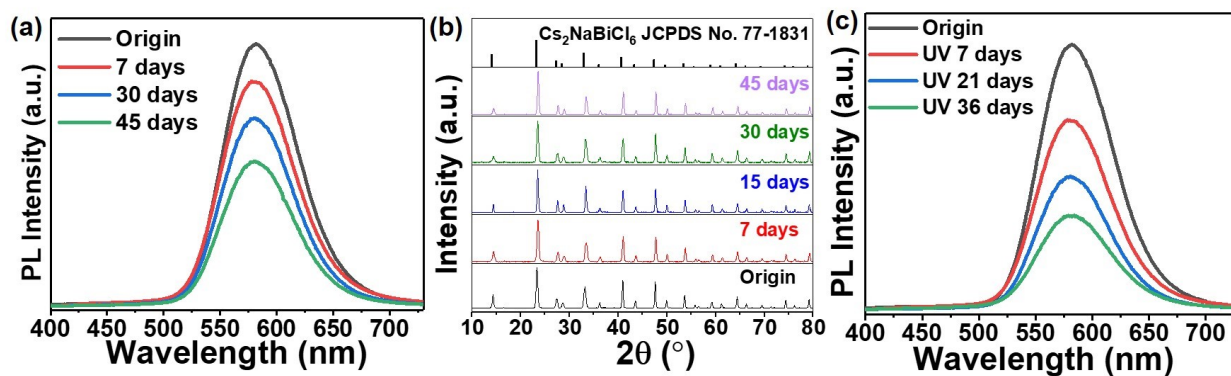

**Fig. S11** Stability analyses of the representative Mn-doped CNBC octahedrons. (a-b) Evolution of PL spectra (a) and XRD patterns (b) over time under UV irradiation. (c) Evolution of PL spectra over time under ambient condition.

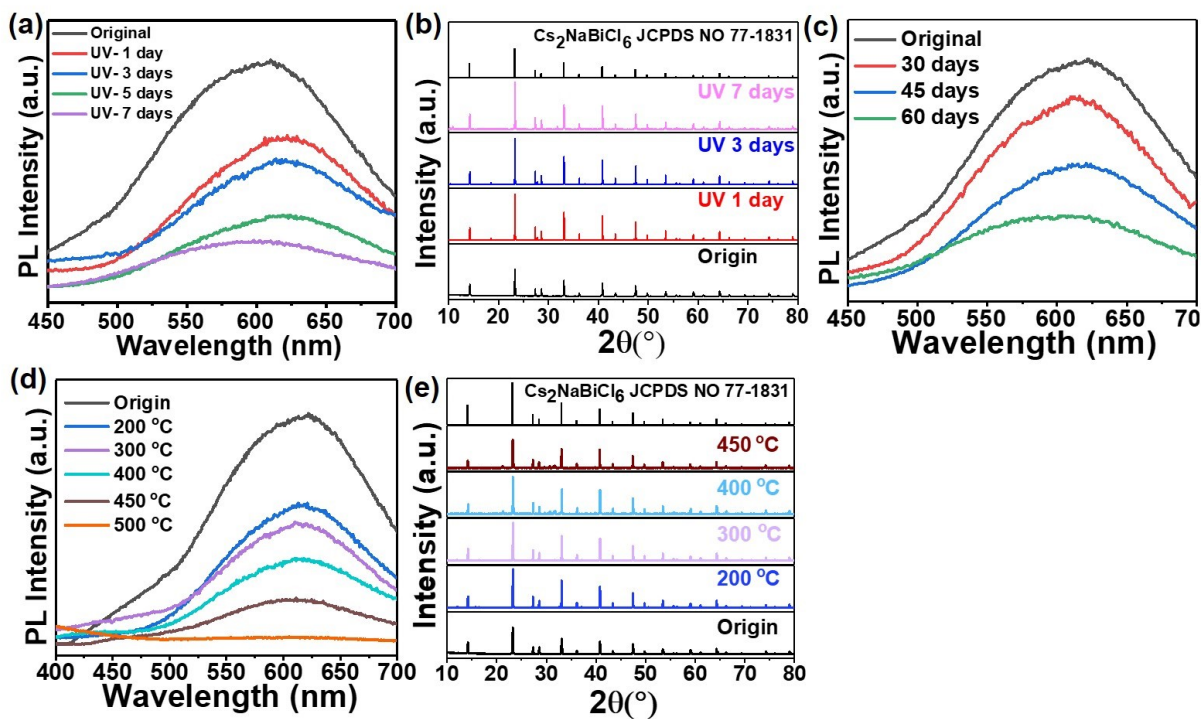

**Fig. S12** Stability analyses of the undoped CNBC octahedrons. (a-b) Evolution of PL spectra (a) and XRD patterns (b) over time under UV irradiation. (c) Evolution of PL spectra over time under ambient condition. (d-e) Evolution of PL spectra (d) and XRD patterns (e) over annealing temperature for 2 h.

**Table S1** The percents of the PL intensity compared with the original PL intensity of the various samples under different conditions.

| Samples       | UV irradiation for 7 days | 45 days under ambient environment | Annealing at 300°C for 2 h |
|---------------|---------------------------|-----------------------------------|----------------------------|
| Undoped CNBC  | 22%                       | 54%                               | 53%                        |
| Ag-doped CNBC | 85%                       | 60%                               | 54%                        |
| Mn-doped CNBC | 71%                       | 55%                               | 74%                        |

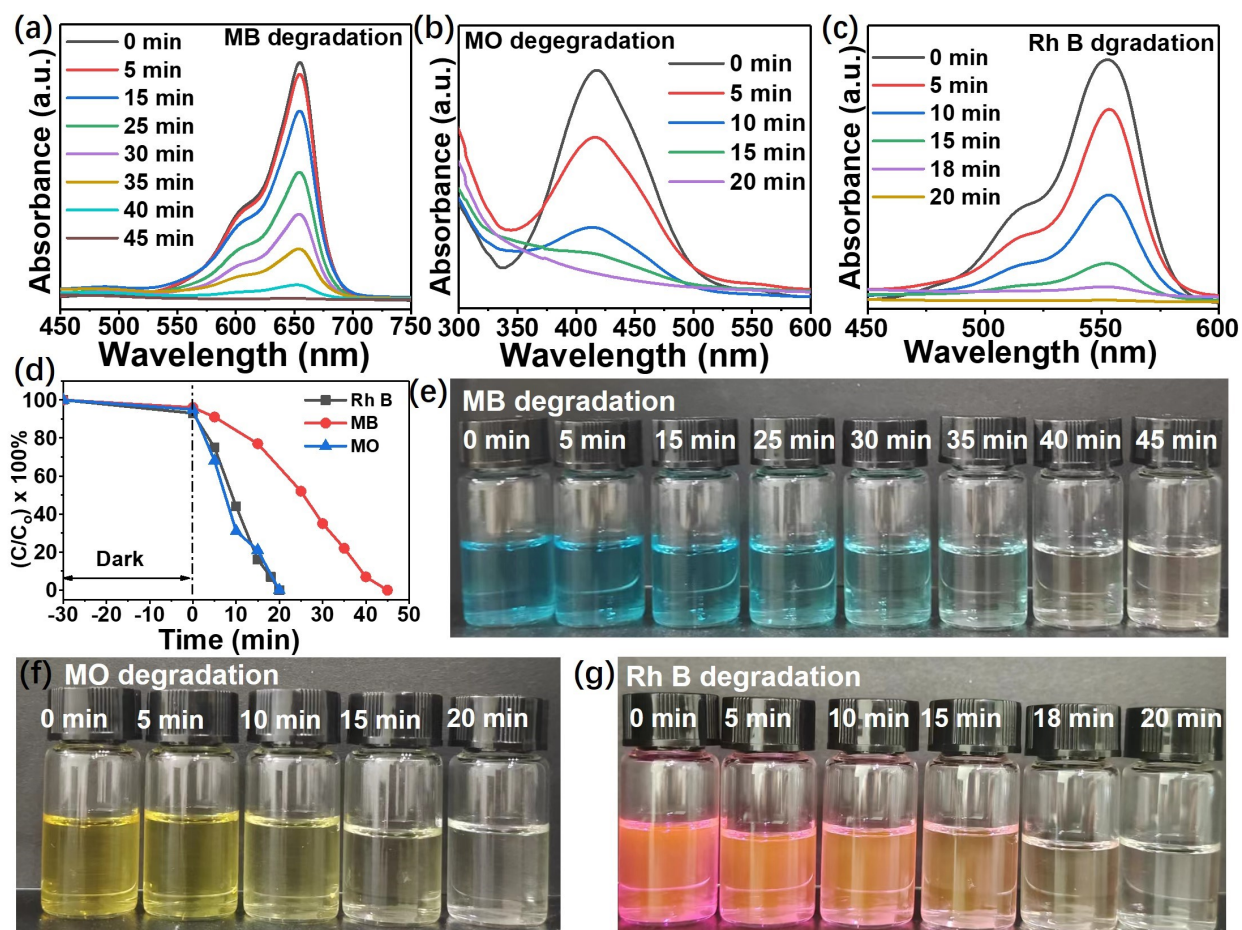

**Fig. S13** (a-c) Evolution of the UV-vis absorption spectra of MB (a), MO (b) and RhB (c) during photocatalytic degradation in the presence of Ag-doped CNBC sample. (d-f) The digital photographs of the corresponding dye solutions as-dictated in each panel, during photocatalytic degradation in the presence of Ag-doped CNBC sample.

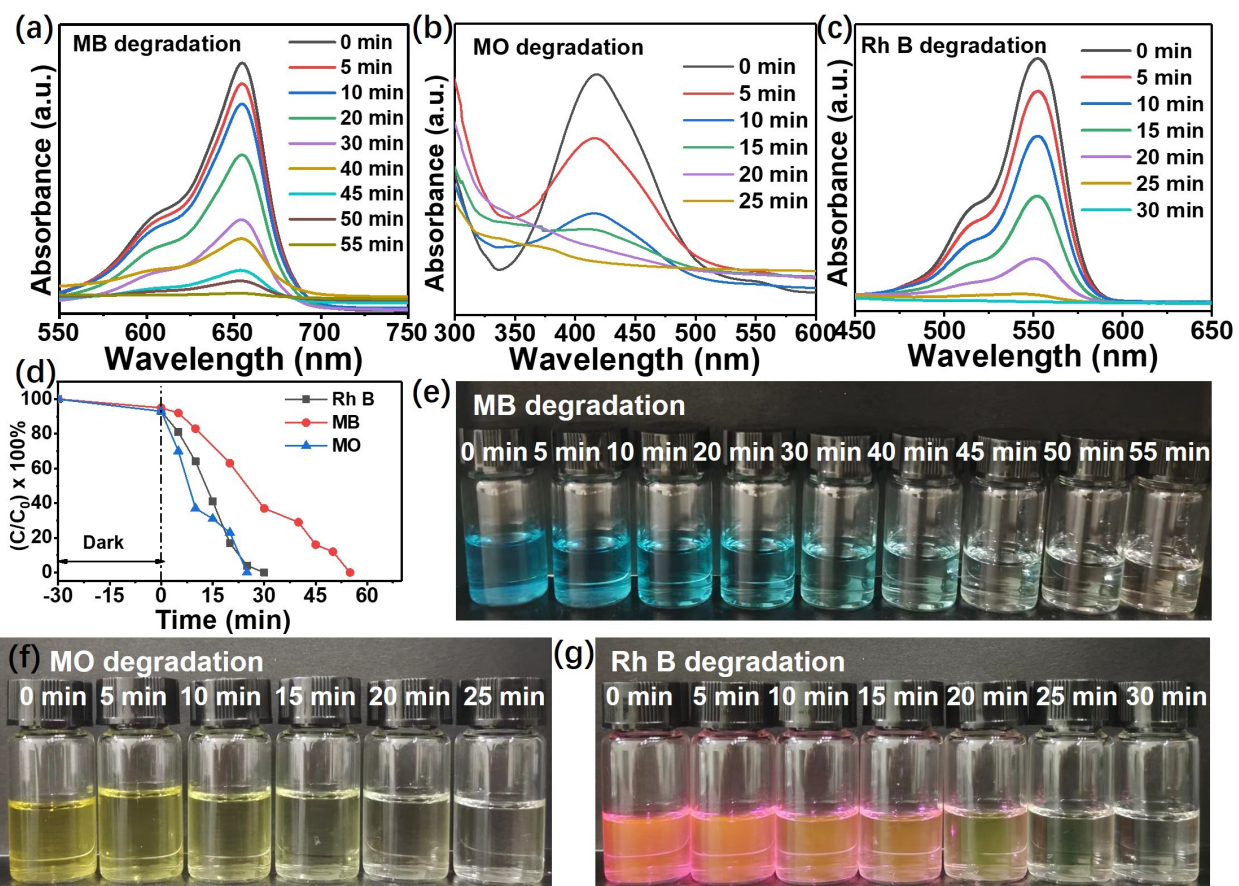

**Fig. S14** (a-c) Evolution of the UV-vis absorption spectra of MB (a), MO (b) and RhB (c) during photocatalytic degradation in the presence of Mn-doped CNBC sample. (d-f) The digital photographs of the corresponding dye solutions as-dictated in each panel, during photocatalytic degradation in the presence of Ag-doped CNBC sample.
